# Supplementary material for: Leaching and Geochemical Modelling of an Electric Arc Furnace (EAF) and Ladle Slag Heap
Source: MDPI journal article supplement (doi:10.3390/toxics10010010), 2022-01-01

Supplementary Material

# Leaching and geochemical modelling of an electric arc furnace (EAF) and ladle slag heap

Mojca Lončnar<sup>1\*</sup>, Ana Mladenović<sup>2</sup>, Vesna Zalar Serjun<sup>2</sup>, Marija Zupančič<sup>3</sup>, Hans A. van der Sloot<sup>4</sup>

**Table S1:** Range and average concentration of additional parameters (µg/L) in GW during period 2011 – 2019 (n=126). The reference piezometers designated P1 and P2, respectively. ‘<’ denotes the value was below the given limit of detection (LOD). Where measurements were below the LOD, the value equal to ½ LOD was used for calculating the average concentration.

|    | Al<br>min – max<br>average | B<br>min – max<br>average | Ba<br>min – max<br>average | Fe<br>min – max<br>average | Mn<br>min – max<br>average | TOC<br>min – max<br>average | Cl <sup>-</sup><br>min – max<br>average |
|----|----------------------------|---------------------------|----------------------------|----------------------------|----------------------------|-----------------------------|-----------------------------------------|
| P1 | <1–39*<br>4.1±9.9          | 25–198**<br>108±32        | <5–108***<br>17±25         | <10–23<br>6.7±4.6          | 27.6–358****<br>99±78      | 470–3,940<br>1,600±900      | 17,100–28,300<br>21,000±2,800           |
| P2 | <1–195*<br>1.1±1.3         | 24.2–123<br>58±33         | <5–58.5***<br>31±16        | <10–13.5****<br>5.7±2      | <3–62.1****<br>21±22       | 150–3,640#<br>1,700±1100    | 14,900–24,900<br>19,000±2,800           |
| P3 | <1–19.5*<br>1.8±4.6        | 11–95<br>39±24            | <5–62<br>27±18             | <10<br>5.2±0.9             | <3–354****<br>107±77       | 330–4,300<br>1,400±1100     | 13,800–25,000<br>17,900±3,200           |
| P4 | <1–31.7<br>3.4±7.6         | 57–175<br>105±35          | 30.7–86.8<br>46±15         | <10<br><10                 | <3–38.4<br>14±11           | 150–3,510<br>1,500±1000     | 13,200–25,200<br>18,500±3,300           |
| P5 | <1–2.7*<br>1.04±0.76       | 15.1–70<br>42±13          | 28.8–74<br>43.6            | <10<br><10                 | <3–34.8****<br>6.6±7.6     | 150–4,400<br>1,400±1300     | 7,540–23,800<br>14,700±4,900            |
| P6 | <1–4.0<br>1.12±0.95        | 30–108<br>68±20           | 37.4–93.7<br>54±15         | <10<br><10                 | <3–27.3****<br>5.1±6.5     | 518–3,240<br>1,400±800      | 15,800–29,300<br>20,900±3,000           |
| P7 | <1–3.2*<br>1.03±0.87       | 22.7–495<br>279±159       | 20.2–1034<br>674±224       | <10–32.7<br>7.7±7.4        | 7.2–853<br>563±168         | 570–4,170<br>2,100±900      | 4,050–14,300<br>7,700±3,300             |

\* Al: 7 outliers excluded (P1, P2, P3, P5, P7), \*\* B: 1 outlier excluded (P1), \*\*\* Ba: 2 outliers s excluded (P1, P2), \*\*\*\*Fe: 1 outlier excluded (P1), \*\*\*\*\*Mn: 5 outliers excluded (P1, P2, P3, P5, P6),#TOC 1 outlier excluded (P2)

**Table S2:** Chemical speciation fingerprint**Model Parameters**

|                              |           |
|------------------------------|-----------|
| Clay (mg/kg)                 | 8.000E+04 |
| Hydrous Ferric Oxide (mg/kg) | 800.0     |
| L/S (L/kg)                   | 10.00     |
| pE                           | 1.580     |
| pH                           | 12.42     |
| Solid Humic Acid (mg/kg)     | 14.87     |

**Reactant concentration**

| Reactant | mg/kg     |       | mg/kg     |     | mg/kg     |    | mg/kg     |
|----------|-----------|-------|-----------|-----|-----------|----|-----------|
| Ag       | 1.079E-07 | CO32- | 1.700E+05 | Li  | 17.27     | Sb | 5.798     |
| Al       | 1.834E+04 | Cr    | 1118      | Mg  | 3.048E+04 | Se | 0.05013   |
| As       | 5.026     | Cu    | 153.1     | Mn  | 8.362     | Sn | 4.474     |
| Ba       | 149.4     | F     | 4254      | Mo  | 23.28     | S  | 1138      |
| Br       | 7.990E-08 | Fe    | 2.397E+04 | Na  | 1147      | Sr | 163.7     |
| Ca       | 1.703E+05 | B     | 168.2     | Ni  | 521.5     | Th | 2.320E-07 |
| Cd       | 1.941     | Si    | 1.142E+04 | NO3 | 30.00     | U  | 2.380E-07 |
| Cl       | 42.90     | Hg    | 2.006E-07 | Pb  | 237.9     | V  | 99.39     |
| Co       | 6.742     | K     | 207.1     | P   | 988.7     | Zn | 629.9     |

**Figure S1:** The measured and predicted leaching behaviour of additional elements as a function of pH. Triangle: the pH dependence test; lines: prediction at L/S = 10 mL/g (green), prediction at L/S = 0.3 mL/g (blue), LOD (limit of detection; solid red line)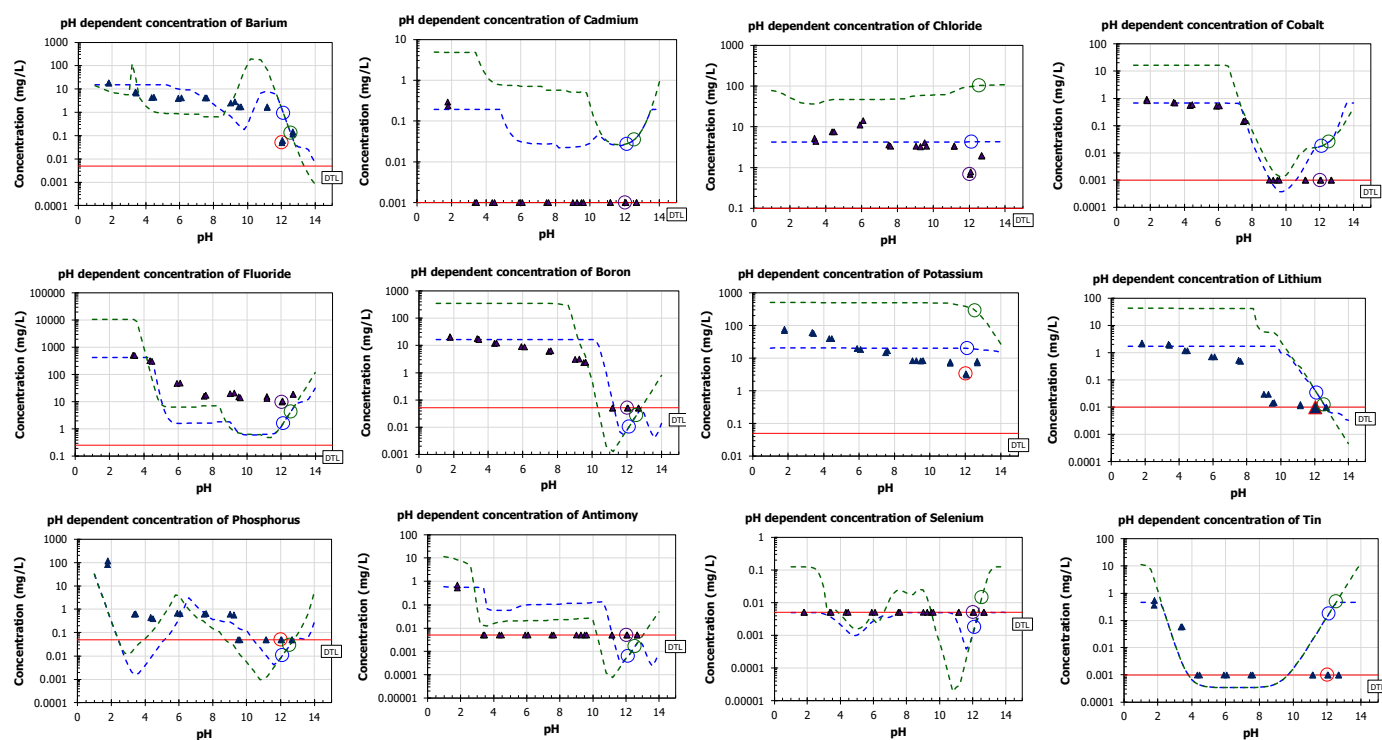

Table S3: The mineral phases

| Solid Solutions            |                                                                                      |                                                                                                           |
|----------------------------|--------------------------------------------------------------------------------------|-----------------------------------------------------------------------------------------------------------|
| Name                       | End Member                                                                           | Log(K) Reaction                                                                                           |
| CEM18_CNASH_ss             | CEM18_5CA                                                                            | 7.002 CEM18_5CA + 0.25 H+ -> 0.25 Al[OH]4- + 1 CEM18_CNASH_ss + 1.25 Ca+2 + 0.25 H2O + 1 H2SiO4-2         |
|                            | CEM18_T2C_CNASHss                                                                    | -2.720 CEM18_T2C_CNASHss + 1 H+ -> 1 CEM18_CNASH_ss + 1.5 Ca+2 + 2 H2O + 1 H2SiO4-2                       |
|                            | CEM18_T5C_CNASHss                                                                    | 10.34 CEM18_T5C_CNASHss -> 1.25 CEM18_CNASH_ss + 1.25 Ca+2 + 1.25 H2O + 1.25 H2SiO4-2                     |
|                            | CEM18_TobH_CNASHss                                                                   | 21.90 CEM18_TobH_CNASHss -> 1.5 CEM18_CNASH_ss + 1 Ca+2 + 1 H+ + 0.5 H2O + 1.5 H2SiO4-2                   |
| CEM18_CSH_II_ss            | CEM18_Jennite                                                                        | -6.533 CEM18_Jennite + 1.333334 H+ -> 1 CEM18_CSH_II_ss + 1.666667 Ca+2 + 1.766667 H2O + 1 H2SiO4-2       |
|                            | CEM18_Tob_II                                                                         | 11.95 CEM18_Tob_II -> 1 CEM18_CSH_II_ss + 0.833333 Ca+2 + 0.333334 H+ + 0.166666 H2O + 1 H2SiO4-2         |
| CEM18_CSHQ_ss              | CEM18_CSHQ_JenD                                                                      | -13.70 CEM18_CSHQ_JenD + 1.6666 H+ -> 0.6667 CEM18_CSHQ_ss + 1.5 Ca+2 + 2.6666 H2O + 0.6667 H2SiO4-2      |
|                            | CEM18_CSHQ_JenH                                                                      | 0.7235 CEM18_CSHQ_JenH + 0.6666 H+ -> 1 CEM18_CSHQ_ss + 1.3333 Ca+2 + 1.5 H2O + 1 H2SiO4-2                |
|                            | CEM18_CSHQ_TobD                                                                      | 1.633 CEM18_CSHQ_TobD + 0.33335 H+ -> 0.6667 CEM18_CSHQ_ss + 0.833375 Ca+2 + 1.3334 H2O + 0.6667 H2SiO4-2 |
|                            | CEM18_CSHQ_TobH                                                                      | 14.85 CEM18_CSHQ_TobH -> 1 CEM18_CSHQ_ss + 0.6667 Ca+2 + 0.6666 H+ + 0.1667 H2O + 1 H2SiO4-2              |
| ettr_ss                    | AsO4_Ettringite_ss                                                                   | 26.79 AsO4_Ettringite_ss + 1 H+ + 8 H2O -> 2 Al[OH]4- + 3 AsO4-3 + 6 Ca+2 + 1 ettr_ss                     |
|                            | Ba_Ettringite_ss                                                                     | 4.008 Ba_Ettringite_ss + 4 H+ + 8 H2O -> 2 Al[OH]4- + 6 Ba+2 + 3 SO4-2 + 1 ettr_ss                        |
|                            | BO3_Ettringite_ss                                                                    | -46.87 BO3_Ettringite_ss + 7 H+ + 8 H2O -> 2 Al[OH]4- + 6 Ca+2 + 3 H2BO3- + 1 ettr_ss                     |
|                            | CrO4_Ettringite_ss                                                                   | -8.592 CrO4_Ettringite_ss + 4 H+ + 8 H2O -> 2 Al[OH]4- + 6 Ca+2 + 3 CrO4-2 + 1 ettr_ss                    |
|                            | Ettringite_ss                                                                        | -10.99 Ettringite_ss + 4 H+ + 8 H2O -> 2 Al[OH]4- + 6 Ca+2 + 3 SO4-2 + 1 ettr_ss                          |
|                            | Li-Ettringite_ss                                                                     | -5.699 Li-Ettringite_ss + 4 H+ + 8 H2O -> 2 Al[OH]4- + 5 Ca+2 + 2 Li+ + 3 SO4-2 + 1 ettr_ss               |
|                            | MoO4_Ettringite_ss                                                                   | -9.592 MoO4_Ettringite_ss + 4 H+ + 8 H2O -> 2 Al[OH]4- + 6 Ca+2 + 3 MoO4-2 + 1 ettr_ss                    |
|                            | PO4_Ettringite_ss                                                                    | 39.10 PO4_Ettringite_ss + 1 H+ + 8 H2O -> 2 Al[OH]4- + 6 Ca+2 + 3 PO4-3 + 1 ettr_ss                       |
|                            | Sb[OH]6-_Ettringite_ss                                                               | -33.80 Sb[OH]6-_Ettringite_ss + 7 H+ + 17 H2O -> 2 Al[OH]4- + 6 Ca+2 + 3 Sb[OH]6- + 1 ettr_ss             |
|                            | SeO4-2_Ettringite_ss                                                                 | -8.592 SeO4-2_Ettringite_ss + 4 H+ + 8 H2O -> 2 Al[OH]4- + 6 Ca+2 + 3 SeO4-2 + 1 ettr_ss                  |
|                            | Sr_Ettringite_ss                                                                     | 4.008 Sr_Ettringite_ss + 4 H+ + 8 H2O -> 2 Al[OH]4- + 3 SO4-2 + 6 Sr+2 + 1 ettr_ss                        |
|                            | VO3_Ettringite_ss                                                                    | -53.79 VO3_Ettringite_ss + 13 H+ + 2 H2O -> 2 Al[OH]4- + 6 Ca+2 + 3 VO2+ + 1 ettr_ss                      |
| Minerals                   |                                                                                      |                                                                                                           |
| Name                       | Log(K) Reaction                                                                      |                                                                                                           |
| AA_2CaO_Fe2O3_8H2O[s]      | -10.12 AA_2CaO_Fe2O3_8H2O[s] + 2 H+ -> 2 Ca+2 + 2 Fe[OH]4- + 5 H2O                   |                                                                                                           |
| AA_Brucite                 | -16.84 AA_Brucite + 2 H+ -> 2 H2O + 1 Mg+2                                           |                                                                                                           |
| AA_Calcite                 | 9.481 AA_Calcite -> 1 CO3-2 + 1 Ca+2                                                 |                                                                                                           |
| AA_CaO_Al2O3_10H2O[s]      | 7.490 AA_CaO_Al2O3_10H2O[s] -> 2 Al[OH]4- + 1 Ca+2 + 6 H2O                           |                                                                                                           |
| AA_Fe[OH]3[am]             | 16.60 AA_Fe[OH]3[am] + 1 H2O -> 1 Fe[OH]4- + 1 H+                                    |                                                                                                           |
| AA_Magnesite               | 9.359 AA_Magnesite -> 1 CO3-2 + 1 Mg+2                                               |                                                                                                           |
| AA_Portlandite             | -22.80 AA_Portlandite + 2 H+ -> 1 Ca+2 + 2 H2O                                       |                                                                                                           |
| Al4[OH]10SO4               | 69.30 Al4[OH]10SO4 + 6 H2O -> 4 Al[OH]4- + 6 H+ + 1 SO4-2                            |                                                                                                           |
| alpha-TCP                  | 25.50 alpha-TCP -> 3 Ca+2 + 2 PO4-3                                                  |                                                                                                           |
| Antimocrandallite-exp      | 63.00 Antimocrandallite-exp + 8 H2O -> 3 Al[OH]4- + 1 Ca+2 + 3 H+ + 2 Sb[OH]6-       |                                                                                                           |
| Austinite-therm            | 11.47 Austinite-therm + 1 H+ -> 1 AsO4-3 + 1 Ca+2 + 1 H2O + 1 Zn+2                   |                                                                                                           |
| Ba[SCr]O4[77%SO4]          | 10.13 Ba[SCr]O4[77%SO4] -> 1 Ba+2 + 0.23 CrO4-2 + 0.77 SO4-2                         |                                                                                                           |
| BaSrSO4[50%Ba]             | 8.221 BaSrSO4[50%Ba] -> 0.5 Ba+2 + 1 SO4-2 + 0.5 Sr+2                                |                                                                                                           |
| Ca[OH]2.Zn[OH]2_exp        | -30.52 Ca[OH]2.Zn[OH]2_exp + 4 H+ -> 1 Ca+2 + 4 H2O + 1 Zn+2                         |                                                                                                           |
| Ca2V2O7                    | -8.750 Ca2V2O7 + 3 H+ -> 1 Ca+2 + 1.5 H2O + 1 VO2+                                   |                                                                                                           |
| Ca3[BO3][PO4]              | -2.216 Ca3[BO3][PO4] + 2 H+ -> 3 Ca+2 + 1 H2BO3- + 1 PO4-3                           |                                                                                                           |
| CaCO3_BaCO3                | 22.00 CaCO3_BaCO3 -> 1 Ba+2 + 2 CO3-2 + 1 Ca+2                                       |                                                                                                           |
| CaCO3_Na2CO3               | 18.30 CaCO3_Na2CO3 -> 2 CO3-2 + 1 Ca+2 + 2 Na+                                       |                                                                                                           |
| CaMoO4[c]                  | 7.940 CaMoO4[c] -> 1 Ca+2 + 1 MoO4-2                                                 |                                                                                                           |
| Cd[OH]2[C]                 | -13.65 Cd[OH]2[C] + 2 H+ -> 1 Cd+2 + 2 H2O                                           |                                                                                                           |
| Co2SiO4                    | 6.289 Co2SiO4 + 2 H+ -> 2 Co+2 + 1 H2SiO4-2                                          |                                                                                                           |
| Cr[OH]3[C]                 | 66.68 Cr[OH]3[C] + 1 H2O -> 1 CrO4-2 + 5 H+ + 3 e-                                   |                                                                                                           |
| Diaspore-exp               | 14.48 Diaspore-exp + 2 H2O -> 1 Al[OH]4- + 1 H+                                      |                                                                                                           |
| FeVO4:2H2O_am              | 23.48 FeVO4:2H2O_am + 2 H2O -> 1 Fe[OH]4- + 1 VO2+                                   |                                                                                                           |
| Fluorite                   | 10.96 Fluorite -> 1 Ca+2 + 2 F-                                                      |                                                                                                           |
| LDH_Cd_zc                  | 60.06 LDH_Cd_zc + 1 H2O -> 1 Al[OH]4- + 3 CO3-2 + 3 Cd+2 + 1 H+                      |                                                                                                           |
| LDH_Cu_zc                  | 58.21 LDH_Cu_zc + 1 H2O -> 1 Al[OH]4- + 3 CO3-2 + 3 Cu+2 + 1 H+                      |                                                                                                           |
| Li2_CaO_Al2O3_SiO2_8H2O[s] | 24.70 Li2_CaO_Al2O3_SiO2_8H2O[s] -> 2 Al[OH]4- + 1 Ca+2 + 3 H2O + 1 H2SiO4-2 + 2 Li+ |                                                                                                           |
| Manganite                  | -25.27 Manganite + 3 H+ + 1 e- -> 2 H2O + 1 Mn+2                                     |                                                                                                           |
| Ni[OH]2[s]                 | -10.80 Ni[OH]2[s] + 2 H+ -> 2 H2O + 1 Ni+2                                           |                                                                                                           |
| OCF                        | 46.90 OCF -> 4 Ca+2 + 1 H+ + 2.5 H2O + 3 PO4-3                                       |                                                                                                           |
| PATCH_Ca5[OH][AsO4]3[c]    | 26.13 PATCH_Ca5[OH][AsO4]3[c] + 1 H+ -> 3 AsO4-3 + 5 Ca+2 + 1 H2O                    |                                                                                                           |
| Pb[OH]2[C]                 | -8.150 Pb[OH]2[C] + 2 H+ -> 2 H2O + 1 Pb+2                                           |                                                                                                           |
| Pb2V2O7                    | 0.9500 Pb2V2O7 + 3 H+ -> 1.5 H2O + 1 Pb+2 + 1 VO2+                                   |                                                                                                           |
| Pb3[VO4]2                  | -3.070 Pb3[VO4]2 + 4 H+ -> 2 H2O + 1.5 Pb+2 + 1 VO2+                                 |                                                                                                           |
| PbMoO4[cc]                 | 13.36 PbMoO4[cc] -> 1 MoO4-2 + 1 Pb+2                                                |                                                                                                           |
| SiO2[a]                    | 24.64 SiO2[a] + 2 H2O -> 2 H+ + 1 H2SiO4-2                                           |                                                                                                           |
| Sn[OH]2[s]                 | 1.447 Sn[OH]2[s] + 2 H+ -> 2 H2O + 1 Sn+2                                            |                                                                                                           |
| Strengite                  | 48.00 Strengite + 2 H2O -> 1 Fe[OH]4- + 4 H+ + 1 PO4-3                               |                                                                                                           |
| Tenorite                   | -7.620 Tenorite + 2 H+ -> 1 Cu+2 + 1 H2O                                             |                                                                                                           |
| Willemite                  | 6.289 Willemite + 2 H+ -> 1 H2SiO4-2 + 2 Zn+2                                        |                                                                                                           |

**Figure S2:** Partiting of the elements of interest over different chemical phases as obtained from the modelling.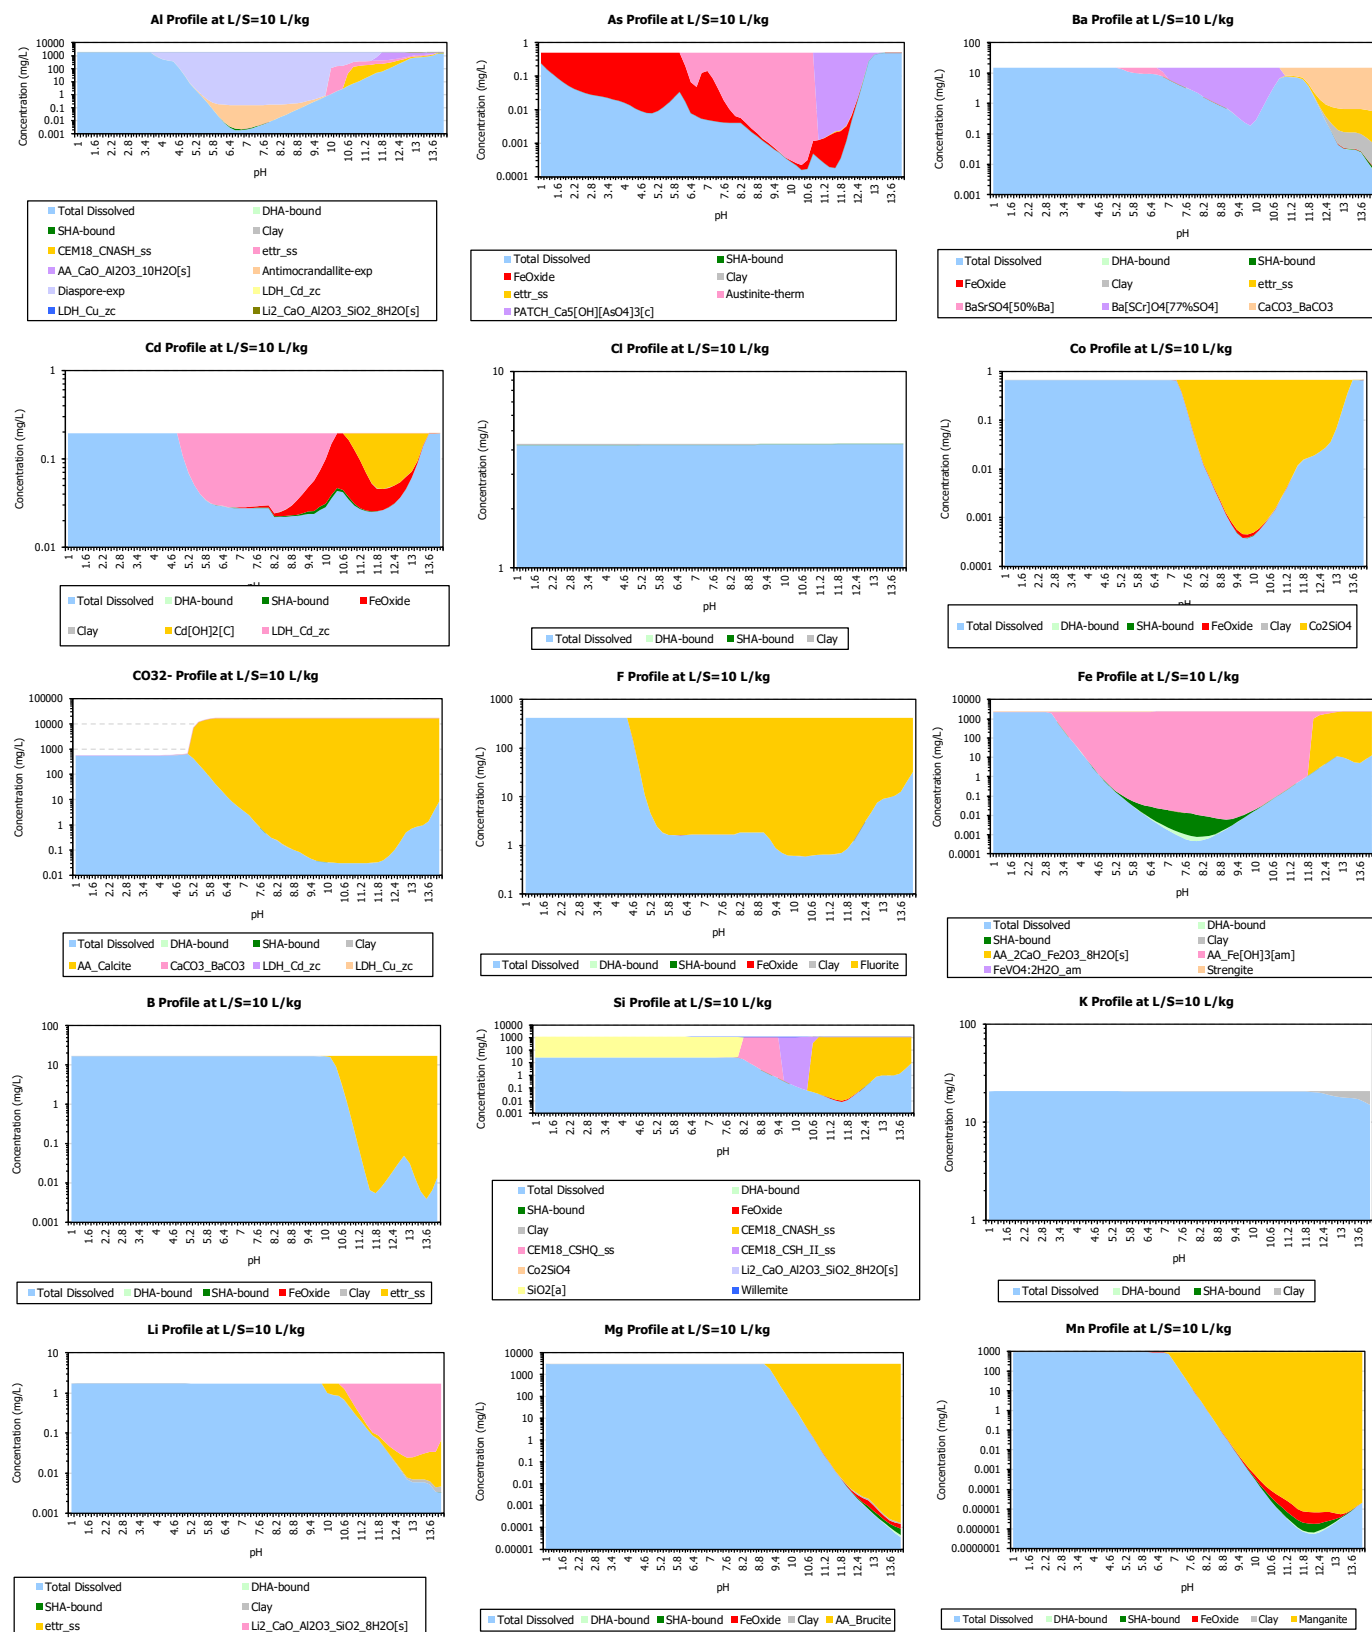

**Figure S3:** Partiting of the elements of interest over different chemical phases as obtained from the modelling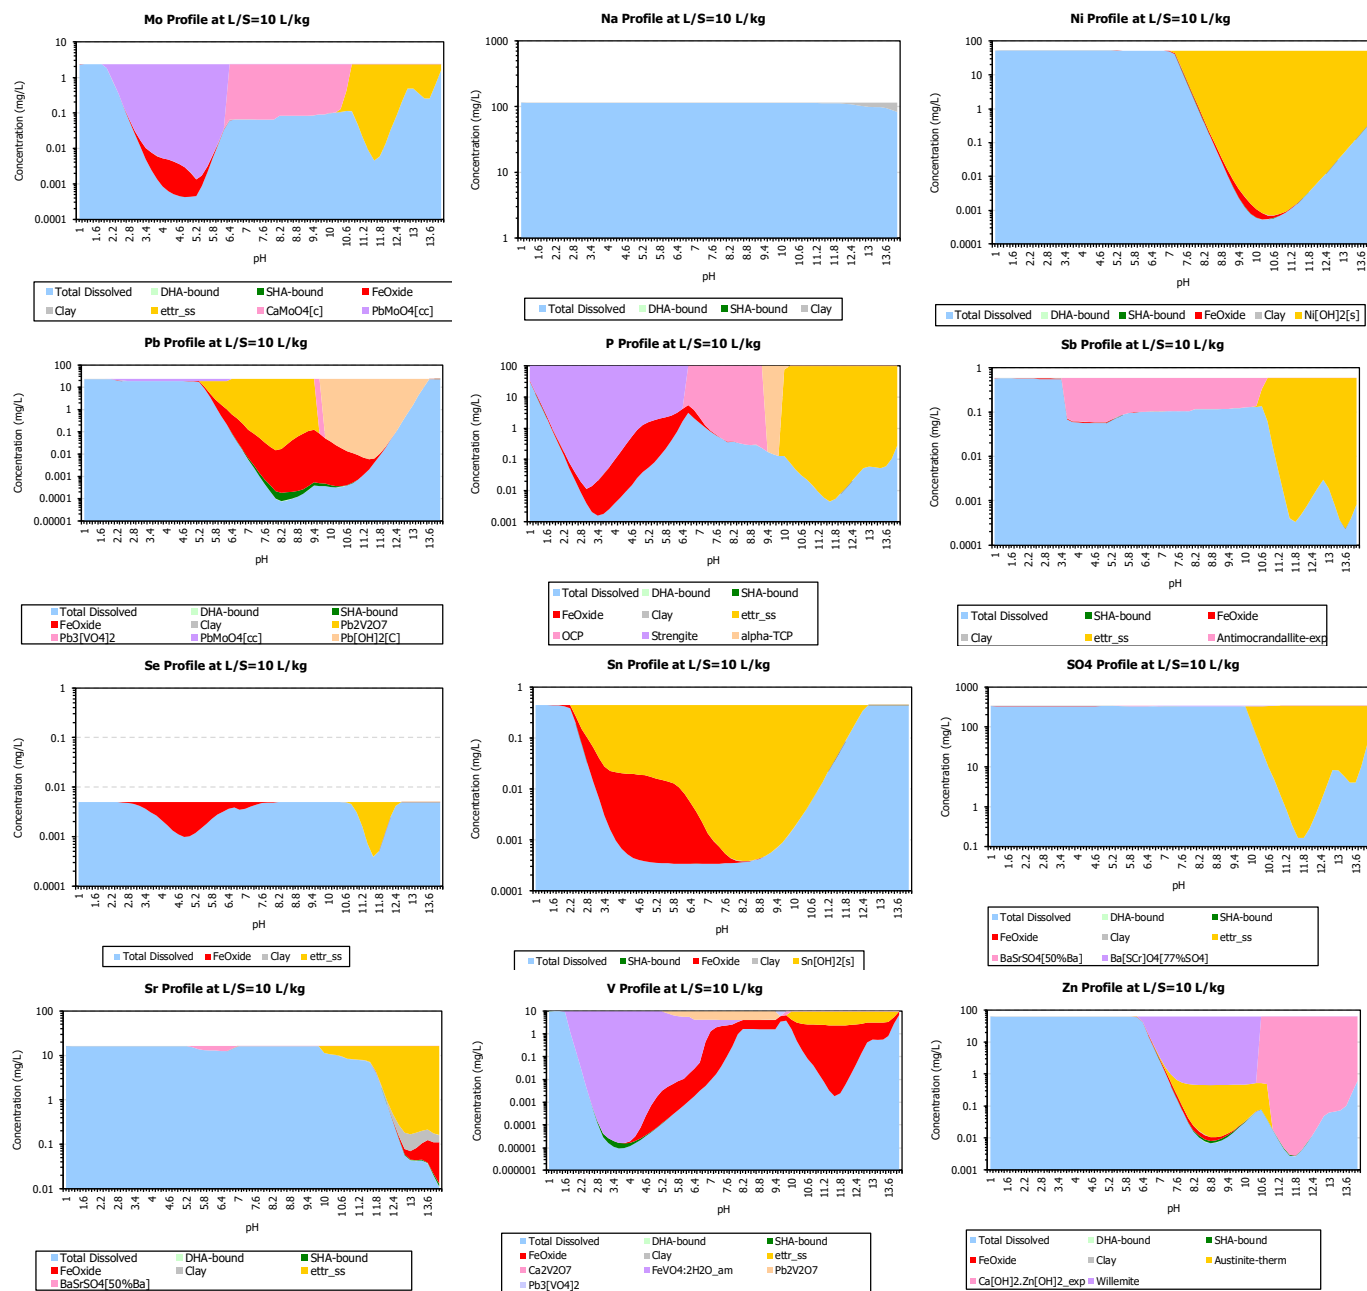

**Figure S4:** Comparison between the predicted leaching behaviour (red line) and the measured pH dependent leaching of the PTO sample (marked by red dots), the GW monitoring (open symbols) and the individual samples from the metallurgical heap (solid symbols; L3, L4, L7, L11 = darker blue symbols; others (L1, L2, L5, L6, L8, L9, L10) = various symbols) batch at L/S = 10 mL/g).

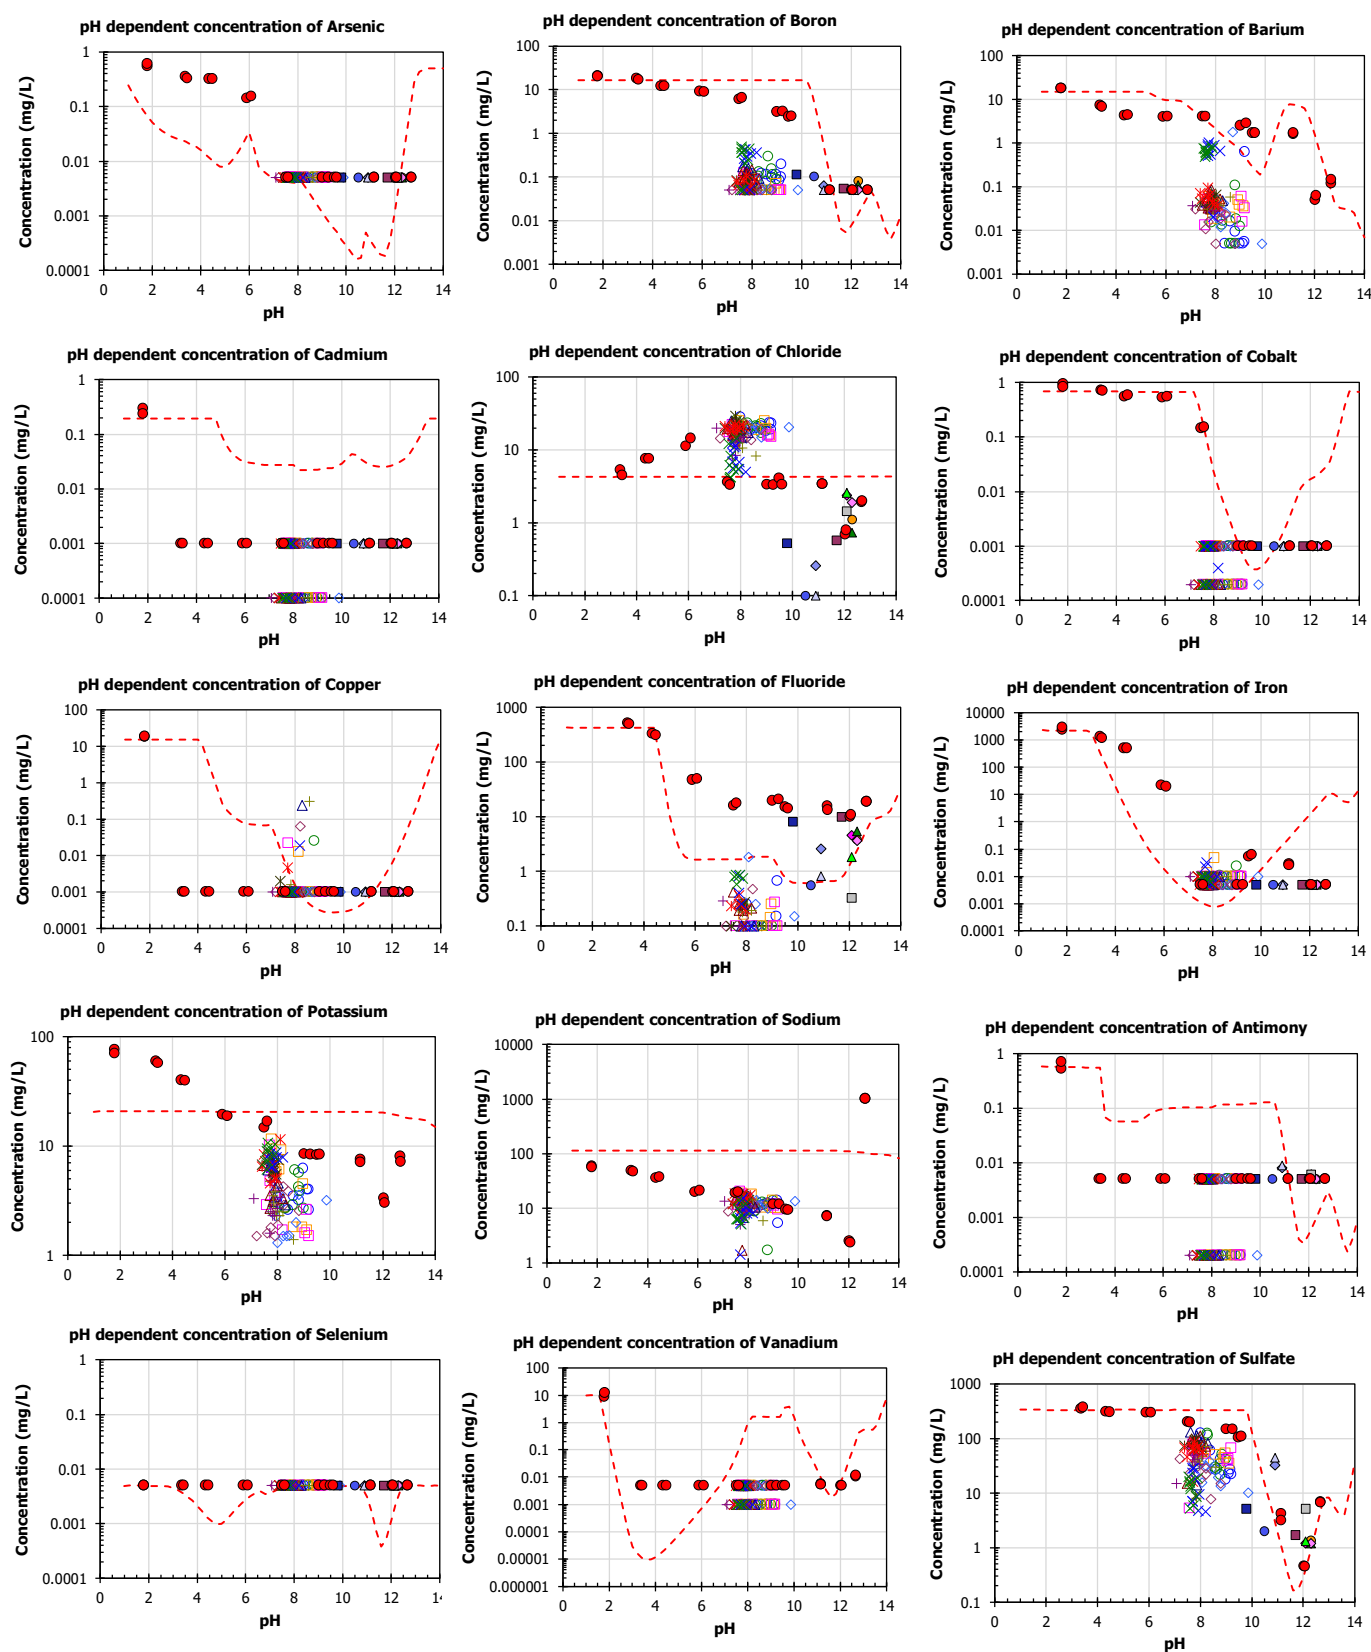

**Figure S5:** Comparison between the predicted leaching behaviour (red dashed line) and the measured pH dependent leaching of the composite landfill sample PTO (red circle), “fresh” EAF S slag (brown triangle) and “fresh” ladle slag (green circle).

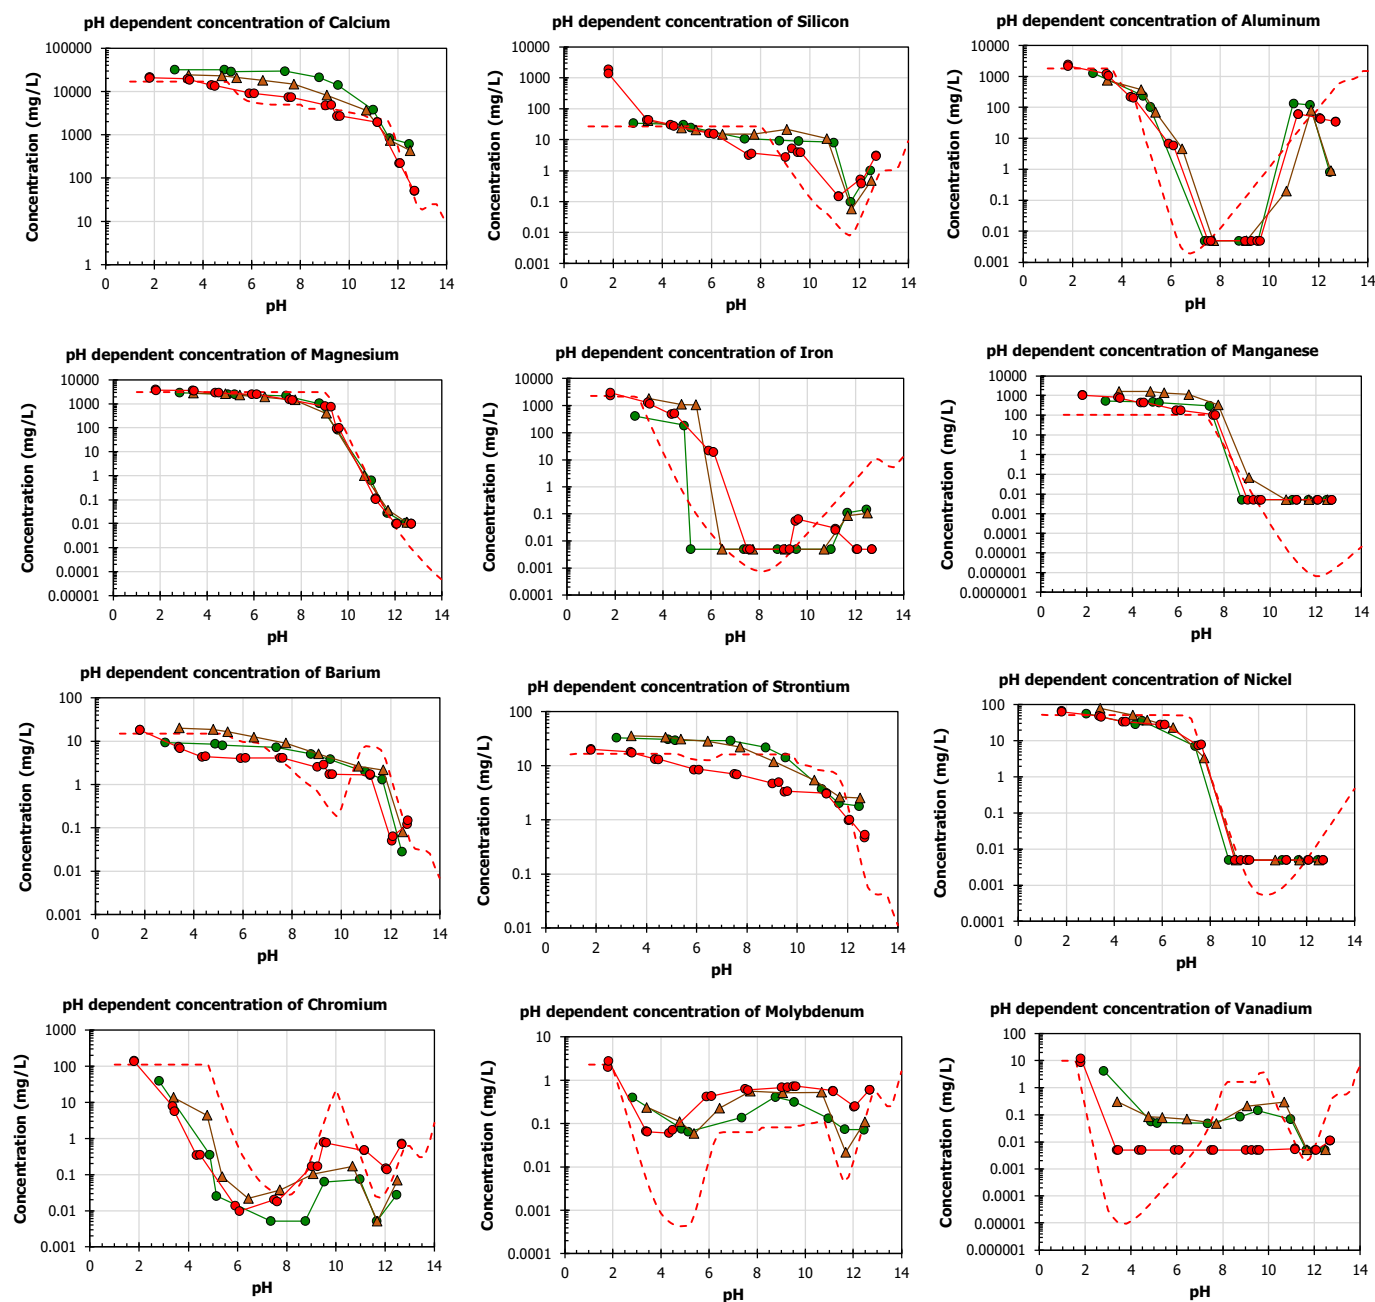

Supplement: s1 [file s1]
